# Supplementary material for: Defect engineering in MIL-125-(Ti)-NH2 for enhanced photocatalytic H2 generation
Source: Royal Society of Chemistry journal article supplement (doi:10.1039/d2ta09963b), 2023-01-01
Supplement: d2ta09963b2.pdf [file d2ta09963b2.pdf]

## Supporting Information

### Defect Engineering in MIL-125-(Ti)-NH<sub>2</sub> for Enhanced Photocatalytic H<sub>2</sub> Generation

*Ladawan Pukdeejorhor,<sup>a</sup> Suttipong Wannapaiboon,<sup>b</sup> Jan Berger,<sup>c</sup> Katia Rodewald,<sup>d</sup> Sutarat Thongratkaew,<sup>e</sup> Sarawoot Impeng,<sup>e</sup> Julien Warnan,<sup>\*,c</sup> Sareeya Bureekaew,<sup>a</sup> Roland A. Fischer,<sup>\*,c</sup>*

<sup>a</sup>School of Energy Science and Engineering, Vidyasirimedhi Institute of Science and Technology, 555 Moo 1 Payupnai, Wangchan, Rayong 21210, Thailand.

<sup>b</sup>Synchrotron Light Research Institute, 111 University Avenue, Muang, Nakhon Ratchasima 30000, Thailand.

<sup>c</sup>TUM School of Natural Sciences, Department of Chemistry, Chair of Inorganic and Metal-Organic Chemistry; Catalysis Research Center (CRC), Technical University of Munich, Lichtenbergstrasse 4, 85748 Garching, Germany.

<sup>d</sup>Wacker-Chair of Macromolecular Chemistry, Catalysis Research Centre, Ernst Otto-Fischer Strasse 1 and Department of Chemistry, Technical University of Munich, Lichtenbergstrasse 4, 85747 Garching b. München, Germany.

<sup>e</sup>National Nanotechnology Center (NANOTEC), National Science and Technology Development Agency (NSTDA), 111 Thailand Science Park, Pahonyothin Rd., Klong Luang, Pathumthani 12120, Thailand.

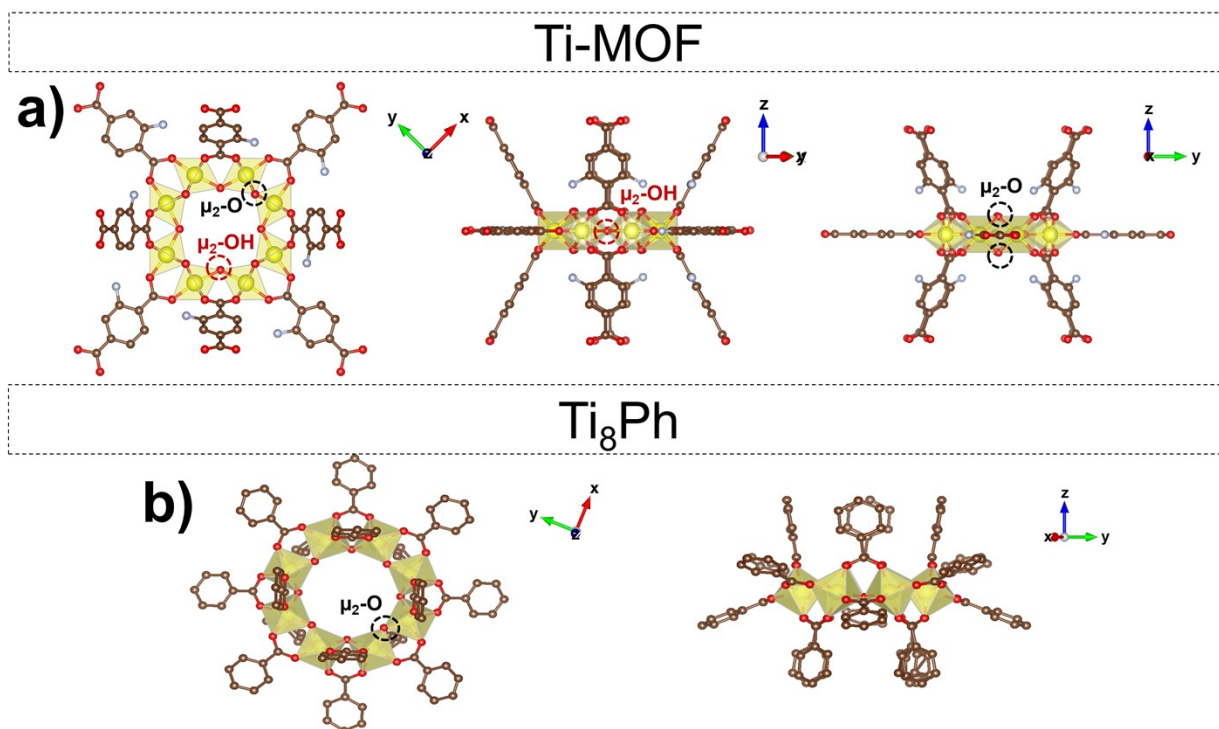

**Figure S1.** Cluster of a) Ti-MOF and b) Ti<sub>8</sub>Ph. Ti; yellow, O; red, C; brown, N; light blue, H atoms are omitted for clarity.

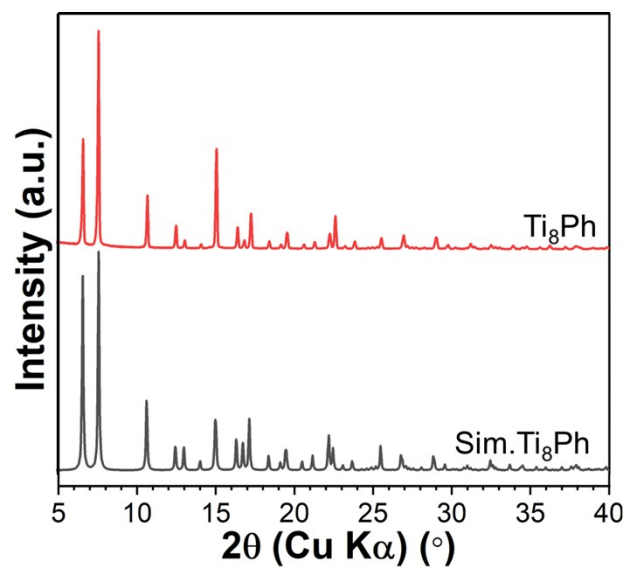

**Figure S2.** PXRD patterns of as-synthesized Ti<sub>8</sub>Ph and simulated Ti<sub>8</sub>Ph.

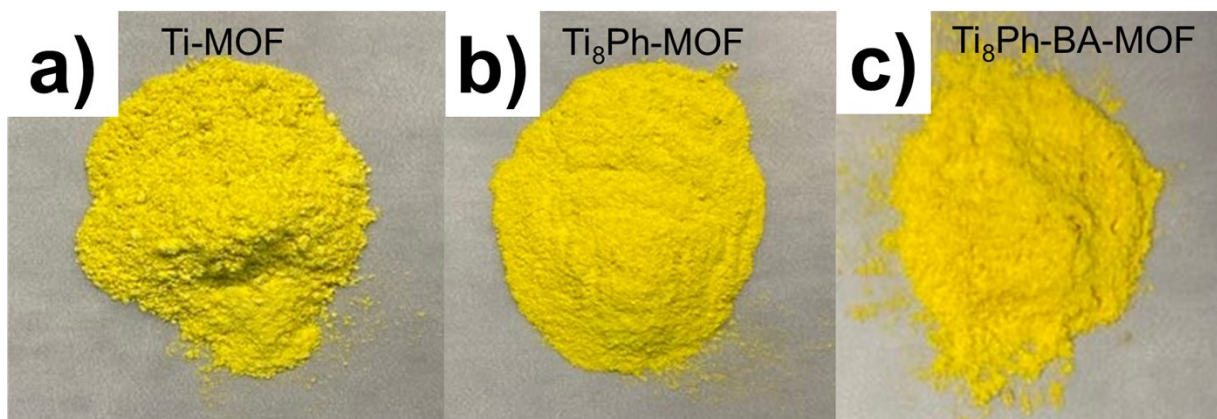

**Figure S3.** Photographs of a) Ti-MOF, b) Ti<sub>8</sub>Ph-MOF, and c) Ti<sub>8</sub>Ph-BA-MOF.

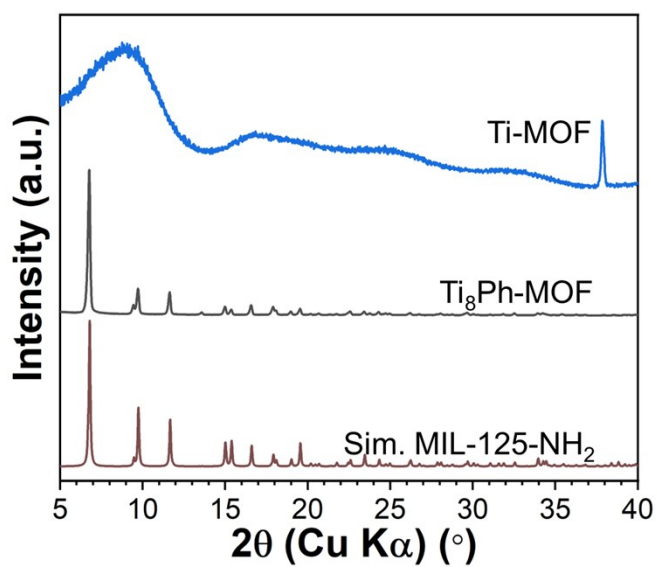

**Figure S4.** PXRD patterns of Ti-MOF, and Ti<sub>8</sub>Ph-MOF synthesized at 70 °C as compared with the simulated reference of MIL-125-NH<sub>2</sub>.

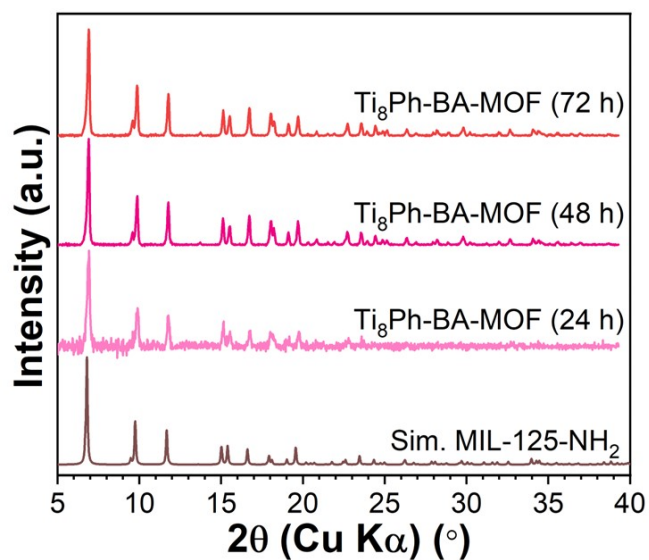

**Figure S5.** PXRD patterns of  $Ti_8Ph-BA-MOF$  synthesized at 70  $^\circ C$  for 24, 48, and 72 h.

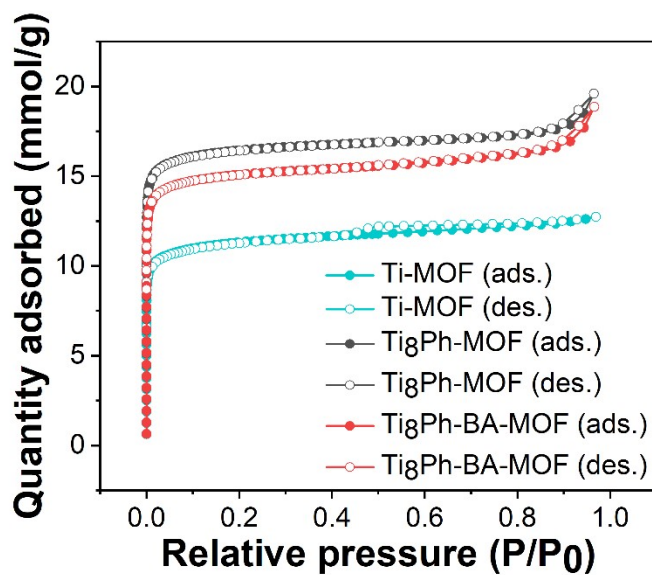

**Figure S6.**  $N_2$  (99.999%) adsorption–desorption isotherms at 77 K, of  $Ti-MOF$ ,  $Ti_8Ph-MOF$ , and  $Ti_8Ph-BA-MOF$ . Free space of the sample tube was determined prior to measuring each isotherm using helium (99.999%).

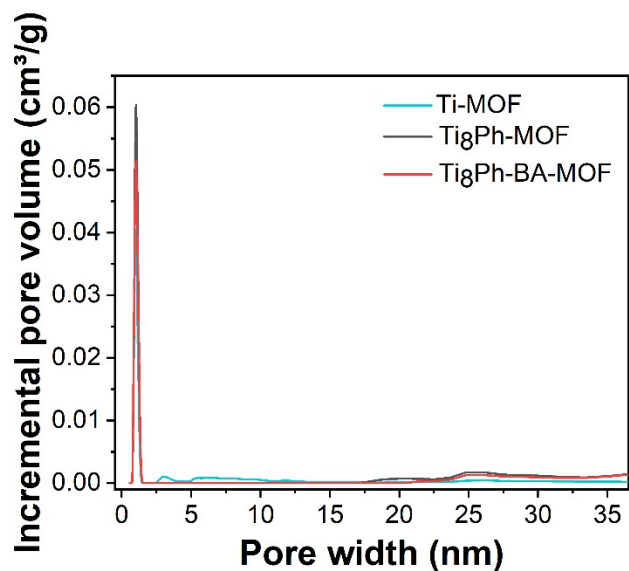

**Figure S7.** Pore size distributions for Ti-MOF, Ti<sub>8</sub>Ph-MOF, and Ti<sub>8</sub>Ph-BA-MOF. Distributions were derived by fitting the N<sub>2</sub> isotherms with sets of calculated isotherms (kernel) derived from non-local DFT (NLDFIT) based methods. Fitting was done via the 3Flex Software Version 5.01 by Micromeritics Instrument Corp. using a kernel for cylindrical pores ('oxide cyl pores, strong potential') provided with the software.

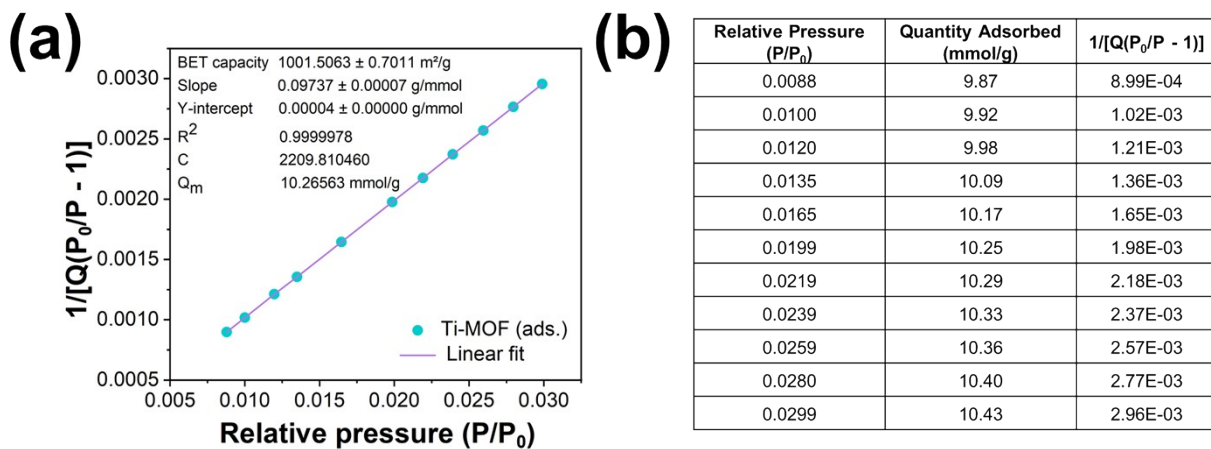

**Figure S8.** a) BET plot with linear fit control parameters and calculated monolayer capacity ( $Q_m$ ), and b) Tabular BET plot data including amounts adsorbed in mmol/g for reference of  $Q_m$  for Ti-MOF.

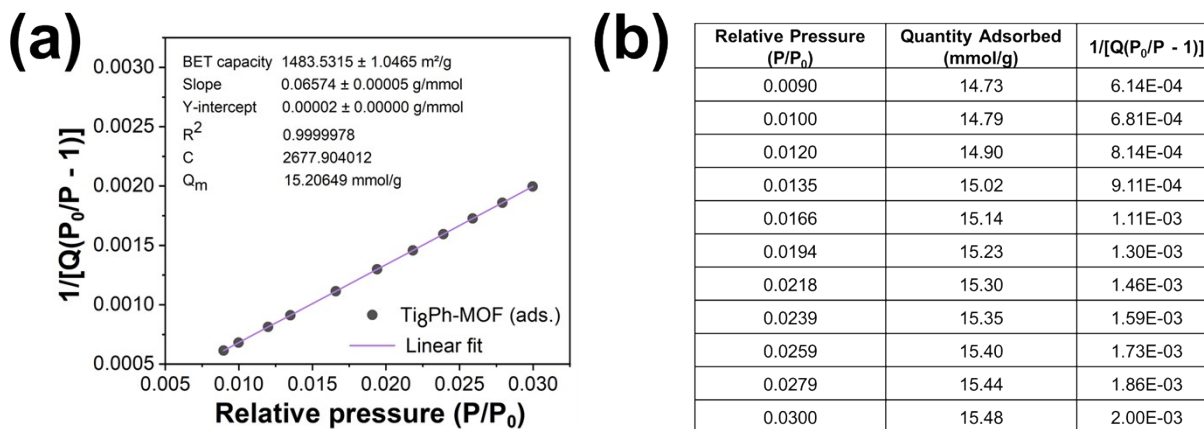

**Figure S9.** a) BET plot with linear fit control parameters and calculated monolayer capacity ( $Q_m$ ), and b) Tabular BET plot data including amounts adsorbed in mmol/g for reference of  $Q_m$  for Ti<sub>8</sub>Ph-MOF.

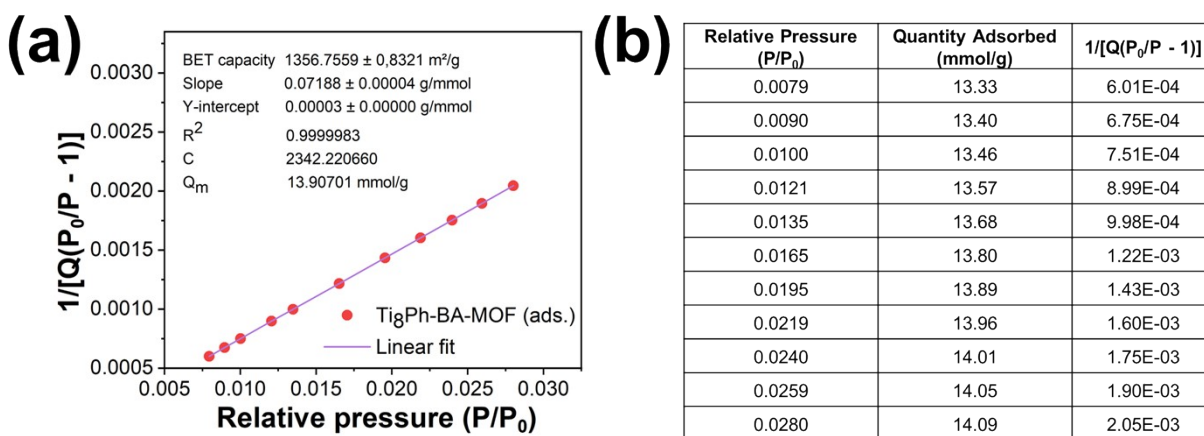

**Figure S10.** a) BET plot with linear fit control parameters and calculated monolayer capacity ( $Q_m$ ), and b) Tabular BET plot data including amounts adsorbed in mmol/g for reference of  $Q_m$  for Ti<sub>8</sub>Ph-BA-MOF.

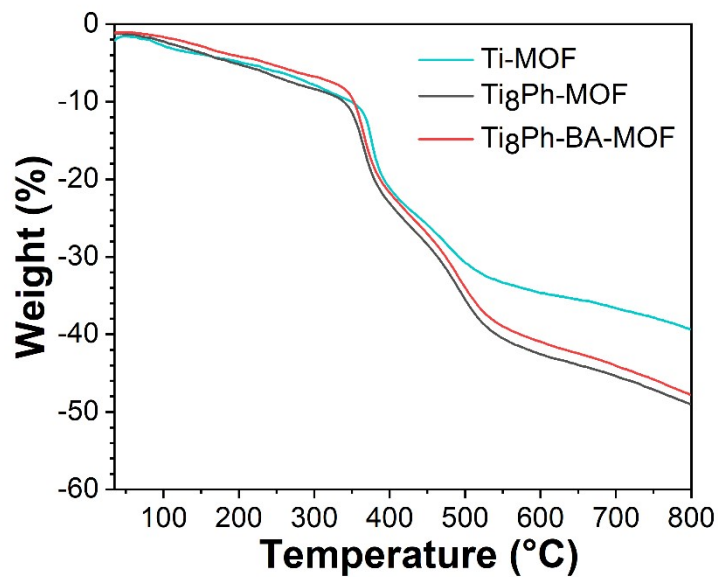

**Figure S11.** TGA curves of Ti-MOF, Ti<sub>8</sub>Ph-MOF, and Ti<sub>8</sub>Ph-BA-MOF after activation under Ar atmosphere.

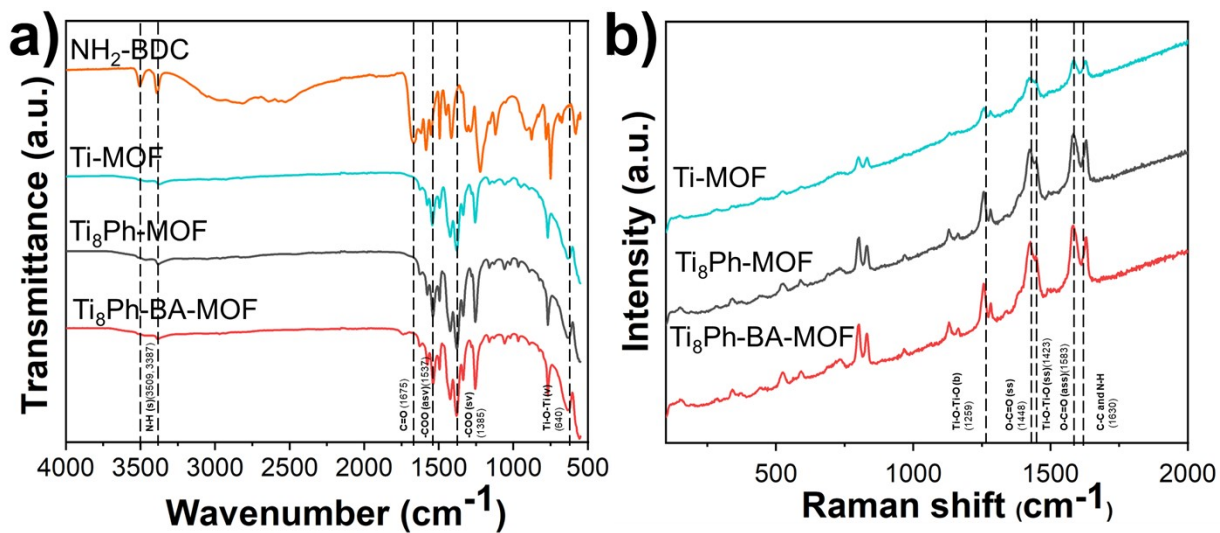

**Figure S12.** Overlaid a) IR and b) Raman spectra of Ti-MOF, Ti<sub>8</sub>Ph-MOF, and Ti<sub>8</sub>Ph-BA-MOF.

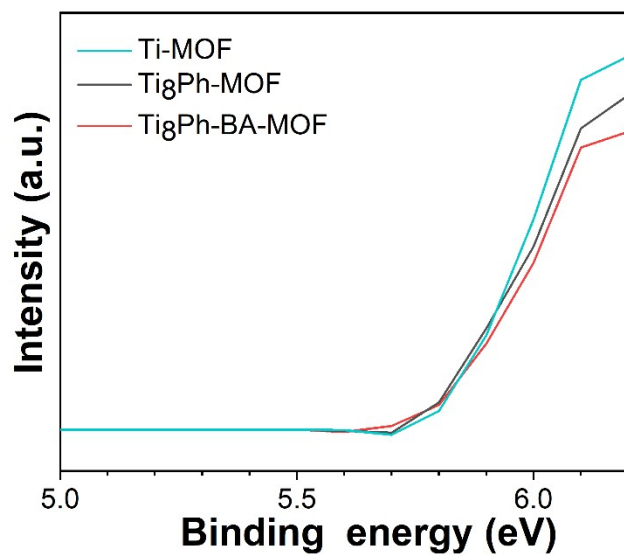

**Figure S13.** UPS spectra of Ti-MOF,  $\text{Ti}_8\text{Ph-MOF}$ , and  $\text{Ti}_8\text{Ph-BA-MOF}$ .

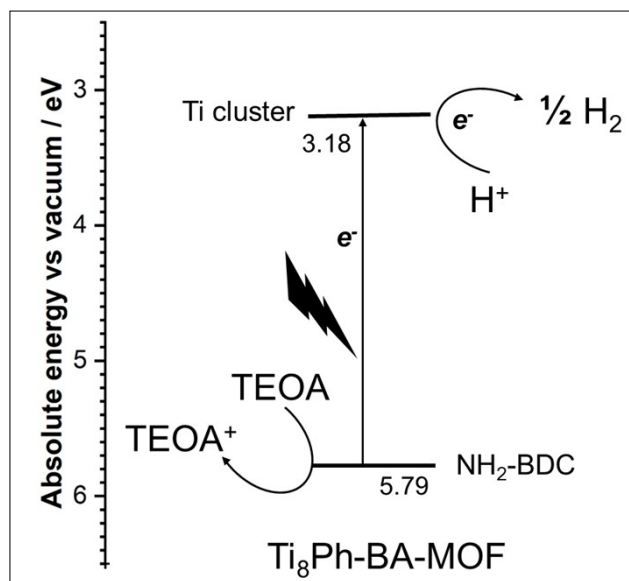

**Figure S14.** Schematic diagram of energy levels of component of  $\text{Ti}_8\text{Ph-BA-MOF}$ .



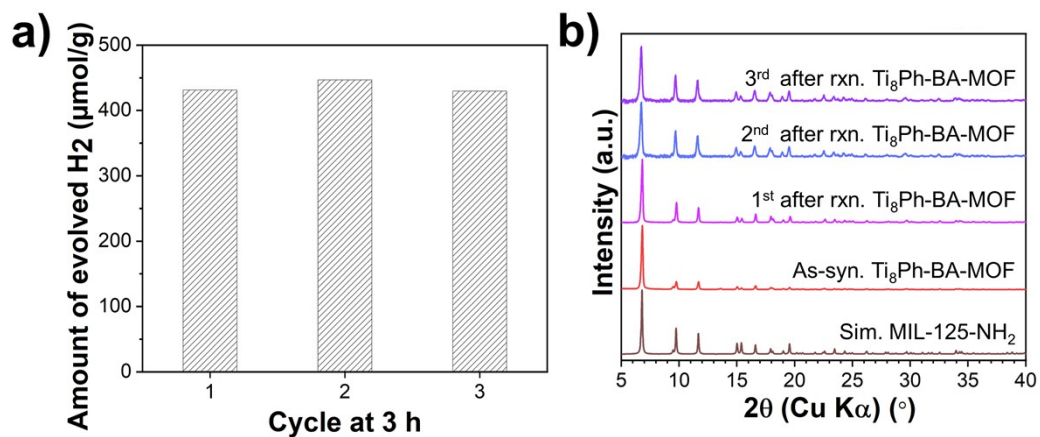

**Figure S15.** a) Result of photocatalytic reactions and b) PXRD patterns of recycling tests on  $Ti_8Ph-BA-MOF$  with re-addition of 1.25 mL TEOA, 1 mL  $H_2O$ , and 22.75 mL  $CH_3CN$ .

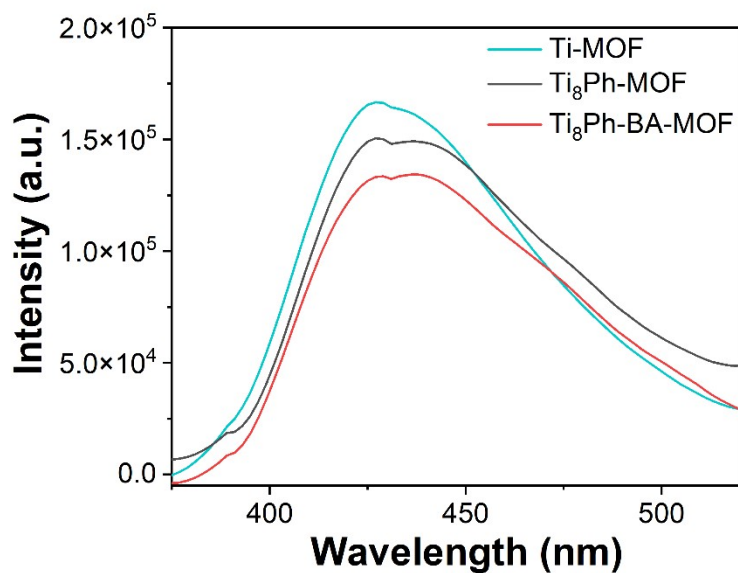

**Figure S16.** Photoluminescence spectra of  $Ti-MOF$ ,  $Ti_8Ph-MOF$ , and  $Ti_8Ph-BA-MOF$  (excited at 370 nm).

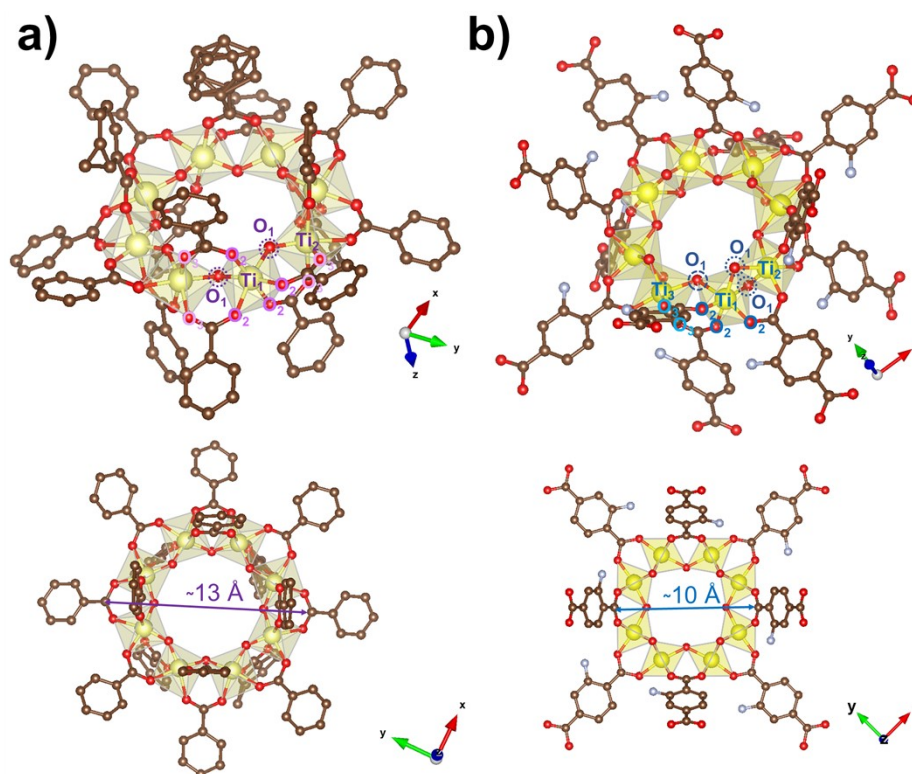

**Figure S17.** Model used for EXAFS analysis derived from local coordination environment of a)  $\text{Ti}_8\text{Ph}$  cluster and b) MIL-125- $\text{NH}_2$  (Ti-MOF). Ti; yellow, O; red, C; brown, N; light blue, H atoms are omitted for clarity.  $\text{O}_1$ ,  $\text{O}_2$ , and  $\text{O}_3$  in  $\text{Ti}_8\text{Ph}$  cluster presented  $\mu_2$ -O at the 1<sup>st</sup> shell,  $\text{O}_{\text{the carboxylate group of linkers at the 1st shell}}$ , and  $\text{O}_{\text{the carboxylate group of linkers at the 3rd shell}}$  from  $\text{Ti}_1$  centre, respectively. Ti-MOF,  $\text{O}_1$  and  $\text{O}_2$  presented both  $\mu_2$ -O &  $\mu_2$ -OH at the 1<sup>st</sup> shell and  $\text{O}_{\text{the carboxylate group of linkers at the 1st shell}}$  from  $\text{Ti}_1$  centre.  $\text{O}_3$  revealed  $\text{O}_{\text{the carboxylate group of linkers at the 3rd shell}}$ .

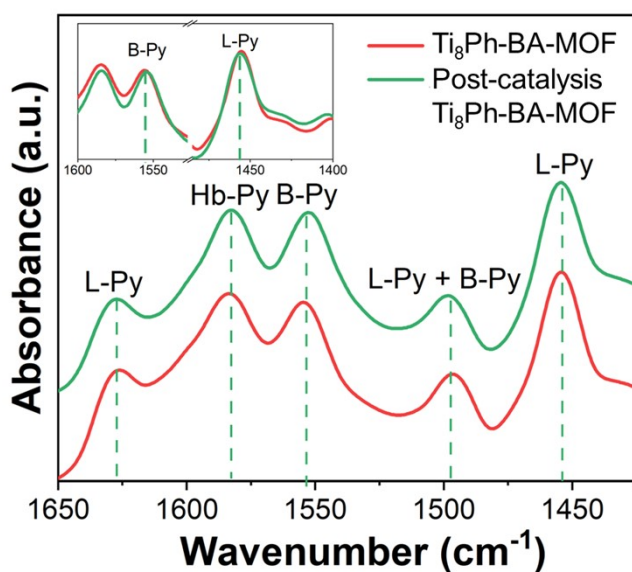

**Figure S18.** DRIFT spectra of pyridine of  $\text{Ti}_8\text{Ph-BA-MOF}$  before and after reaction. Inset: High magnification presented the relative ratio of L-Py at  $1454\text{ cm}^{-1}$  to B-Py at  $1560\text{ cm}^{-1}$ . DRIFT spectra of pyridine of used sample were found similar to the fresh catalyst which indicates structural durability under photocatalysis condition.

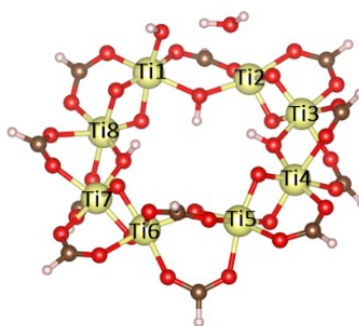

**Figure S19.**  $\text{Ti}_8\text{O}_8(\text{OH})_4(\text{COOH})_{11}(\text{H}_2\text{O})_1(\text{OH})_1$  cluster model.

To investigate the reaction mechanism, the Ti-oxide cluster model representing the active site was taken from the crystal structure of MIL-125(Ti)- $\text{NH}_2$ .<sup>1</sup> To simulate the missing linker defect, one carboxylate linker, BDC- $\text{NH}_2$  was removed from the cluster.  $\text{H}_2\text{O}$  and hydroxide ( $\text{OH}^-$ ) were then placed at the defect site with the intention of neutralizing the charge. To minimize computational expenses, all remaining BDC- $\text{NH}_2$  linkers were replaced with formate. The resultant Ti-oxide cluster with the formula  $\text{Ti}_8\text{O}_8(\text{OH})_4(\text{COOH})_{11}(\text{H}_2\text{O})_1(\text{OH})_1$  (as illustrated in Figure S19) was used as the catalyst model to represent the missing linker defect in MIL-125(Ti)- $\text{NH}_2$ .

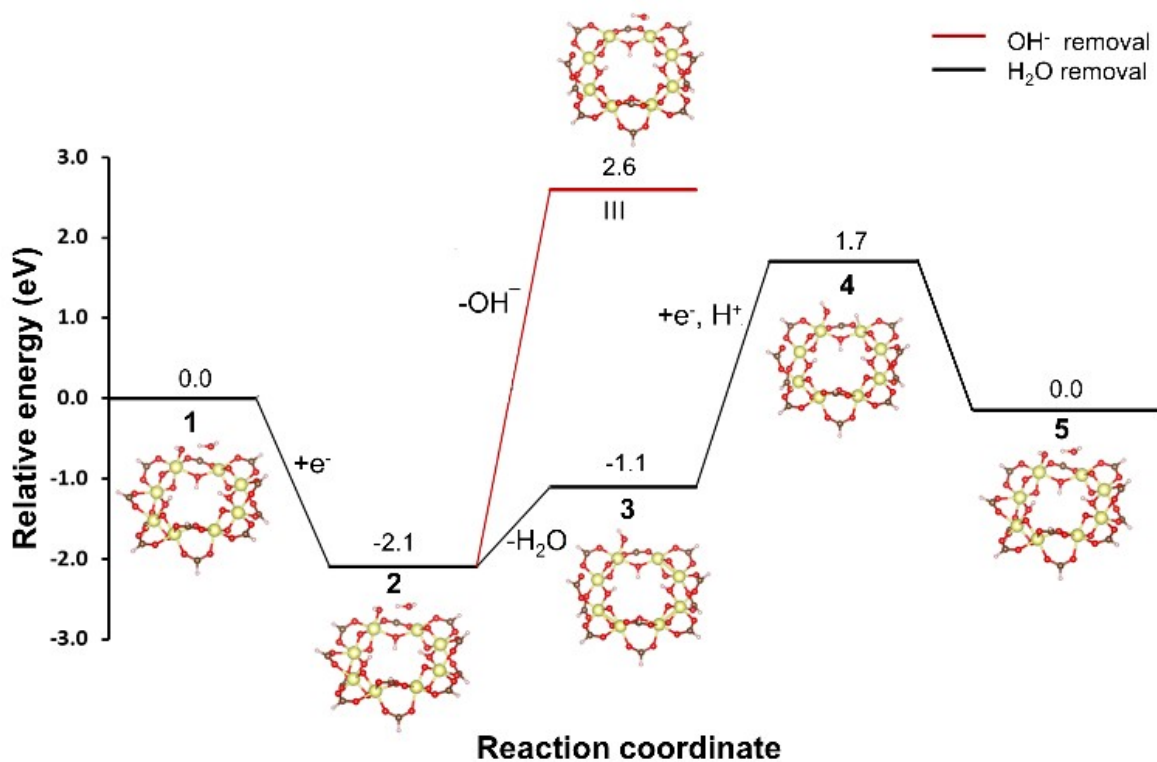

**Figure S20.** Energy profile for HER.



**Table S1.** Sorption Data of Ti-MOF, Ti<sub>8</sub>Ph-MOF, and Ti<sub>8</sub>Ph-BA-MOF

| Sample                    | $S_{\text{BET}}$ (m <sup>2</sup> /g) <sup>a</sup> | $V_{\text{micro}}$ (cm <sup>3</sup> /g) <sup>b</sup> | $V_{\text{total}}$ (cm <sup>3</sup> /g) |
|---------------------------|---------------------------------------------------|------------------------------------------------------|-----------------------------------------|
| Ti-MOF                    | 1001.51 ± 0.70                                    | 0.36                                                 | 0.39                                    |
| Ti <sub>8</sub> Ph-MOF    | 1483.53 ± 1.05                                    | 0.54                                                 | 0.56                                    |
| Ti <sub>8</sub> Ph-BA-MOF | 1356.76 ± 0.83                                    | 0.49                                                 | 0.50                                    |

<sup>a</sup> BET surface areas were calculated by applying the BET model and Rouquerol criteria. <sup>b</sup> Micropore and total pore volume were calculated using a NLDFT kernel (see Figure S5).

**Table S2.** VBM levels (measured by UPS) and energy gaps (obtained via Tauc's plot) for Ti-MOF, Ti<sub>8</sub>Ph-MOF, and Ti<sub>8</sub>Ph-BA-MOF.

| Sample                    | Energy gap (eV) | VBM level (eV) | CBM level (eV) <sup>a</sup> |
|---------------------------|-----------------|----------------|-----------------------------|
| Ti-MOF                    | 2.81            | 5.80           | 2.99                        |
| Ti <sub>8</sub> Ph-MOF    | 2.63            | 5.79           | 3.16                        |
| Ti <sub>8</sub> Ph-BA-MOF | 2.61            | 5.79           | 3.18                        |

<sup>a</sup> Levels were estimated per MOF upon subtracting the energy gap to the VBM.

**Table S3.** Selected reports for photocatalytic hydrogen evolution reaction under visible light irradiation.

| Sample                                                            | Solvent                               | Electron source                                     | Light Source                  | H <sub>2</sub> (μmol/g/h) | Ref.      |
|-------------------------------------------------------------------|---------------------------------------|-----------------------------------------------------|-------------------------------|---------------------------|-----------|
| CdS                                                               | H <sub>2</sub> O                      | Lactic acid                                         | 500 W Xe lamp (> 420 nm)      | ~150                      | [2]       |
|                                                                   | H <sub>2</sub> O                      | Na <sub>2</sub> S + Na <sub>2</sub> SO <sub>3</sub> | 350 W Xe lamp (> 400 nm)      | ~60                       | [3]       |
| N-doped TiO <sub>2</sub> P25                                      | H <sub>2</sub> O                      | Formic acid                                         | 15 W visible fluorescent lamp | ~10                       | [4]       |
| Cu <sup>2+</sup> -porphyrin MOF                                   | H <sub>2</sub> O                      | Ascorbic acid                                       | 300 W Xe lamp (> 420 nm)      | ~2                        | [5]       |
| Porphyrin Ti-MOF                                                  | H <sub>2</sub> O                      | Ascorbic acid                                       | 300 W Xe lamp (> 420 nm)      | -                         | [6]       |
| MIL-100(Fe)                                                       | H <sub>2</sub> O                      | MeOH                                                | 300 W Xe lamp (> 420 nm)      | ~6                        | [7]       |
| MIL-101(Cr)-NH <sub>2</sub>                                       | H <sub>2</sub> O                      | TEOA                                                | 500 W Xe lamp (> 420 nm)      | -                         | [8]       |
| MIL-101(Cr)-NH <sub>2</sub> + RuN <sub>3</sub> <sup>a</sup> (dye) |                                       |                                                     |                               | ~60                       |           |
| Co-ZIF-67                                                         | CH <sub>3</sub> CN + H <sub>2</sub> O | TEOA                                                | blue LED (405nm)              | -                         | [9]       |
| Co-ZIF-67 + RhB <sup>b</sup> (dye)                                |                                       |                                                     |                               | ~10                       |           |
| UiO-66(Zr)-NH <sub>2</sub>                                        | CH <sub>3</sub> CN + H <sub>2</sub> O | TEA                                                 | 500 W Xe/Hg lamp (> 385 nm)   | ~1                        | [10]      |
| defective UiO-66(Zr)-NH <sub>2</sub>                              |                                       |                                                     |                               | ~2                        |           |
| MIL-125(Ti)-NH <sub>2</sub>                                       | CH <sub>3</sub> CN + H <sub>2</sub> O | TEOA                                                | 300 W Xe lamp (>380 nm)       | ~20                       | [11]      |
| Ti <sub>8</sub> Ph-BA-MOF                                         | CH <sub>3</sub> CN + H <sub>2</sub> O | TEOA                                                | 300 W Xe lamp (430-740 nm)    | ~150                      | This Work |

<sup>a</sup>(cis-diisothiocyanato-bis (2,2'-bipyridyl-4,4'-dicarboxylic acid) ruthenium(II)).<sup>b</sup>Rhodamine B.**Table S4** The HOMO and LUMO, at the isosurface values of 0.03 of the intermediate species along the HER pathway.

| System | Leve of calculations: MP2-6-31G**/LANL2DZ(Ti)                                       |                                                                                      |
|--------|-------------------------------------------------------------------------------------|--------------------------------------------------------------------------------------|
|        | HOMO                                                                                | LUMO                                                                                 |
| 3      | 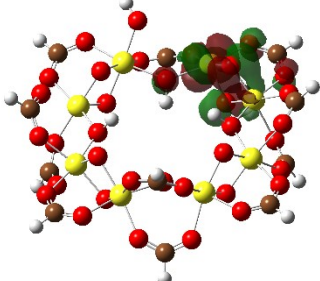 |  |

**Table S5** Mulliken charges and spin densities ( $\rho_\alpha - \rho_\beta$ ) calculated at MP2-6-31G\*\*/LANL2DZ level of theory of Ti of Ti-OH and Ti-OH<sub>2</sub> of the intermediate species along the HER pathway.

| System | Charge (e)          |                    | Spin density ( $\rho_\alpha - \rho_\beta$ ) |                       |
|--------|---------------------|--------------------|---------------------------------------------|-----------------------|
|        | MP2-6-31G**/LANL2DZ |                    | MP2-6-31G**/LANL2DZ                         |                       |
|        | Ti-OH               | Ti-OH <sub>2</sub> | Ti-OH                                       | Ti-OH <sub>2</sub>    |
| 1      | 2.27                | 2.30               | -                                           | -                     |
| 2      | 2.27                | 2.27               | 0.00                                        | 0.00<br>(Ti5 = 0.98)* |
| 3      | 2.22                | 1.90               | 0.00                                        | 1.00                  |
| III    | 1.31                | 2.31               | -                                           | -                     |
| 4      | 2.23                | 1.94               | -                                           | -                     |

\*Ti5 as shown in Figure S19

## References

- [1] A. P. Smalley, D. G. Reid, J. C. Tanb and G. O. Lloyd, *CrystEngComm*, 2013, **15**, 9368-9371.
- [2] X. Zong, H. Yan, G. Wu, G. Ma, F. Wen, L. Wang and C. Li, *J. Am. Chem. Soc.*, 2008, **130**, 7176–7177.
- [3] J. Yu, J. Zhanga and M. Jaroniec, *Green Chem.*, 2010, **12**, 1611-1614.
- [4] K. Villa, A. Black, X. Domenech and J. Peral, *Sol. Energy*, 2012, **86**, 558-566.
- [5] Q. Zuo, T. Liu, C. Chen, Y. Ji, X. Gong, Y. Mai and Y. Zhou, *Angew. Chem., Int. Ed.*, 2019, **58**, 10198-1020.
- [6] X. Wang, X. Zhang, W. Zhou, L. Liu, J. Ye and D. Wang, *Nano Energy*, 2019, **62**, 250-258.
- [7] D. Wang, Y. Song, J. Cai, L. Wu and Z. Li, *New J. Chem.*, 2016, **40**, 9170-9175.
- [8] M. Wen, K. Mori, T. Kamegawaab and H. Yamashita, *Chem. Commun.*, 2014, **50**, 11645-1164.
- [9] S. Yang, B. Pattengale, E. L Kovrigin and J. Huang, *ACS Energy Lett.*, 2017, **2**, 75-80.
- [10] M. A. Nasalevich, C. H. Hendon, J. G. Santaclara, K. Svane, B. van der Linden, S. L. Veber, M. V. Fedin, A. J. Houtepen, M. A. van der Veen, F. Kapteijn, A. Walsh and J. Gascon, *Sci. Rep.*, 2016, **6**, 23676.
- [11] Z. Li, J. D. Xiao and H. L. Jiang, *ACS Catal.*, 2016, **6**, 5359-5365
